# Supplementary material
Source: publisher figshare collection journal article supplement (https://future-science-group.figshare.com/ndownloader/files/30448017)
Supplement: Supplementary file 1 [file 30448017]

Supporting Information

Supplementary Figure 1


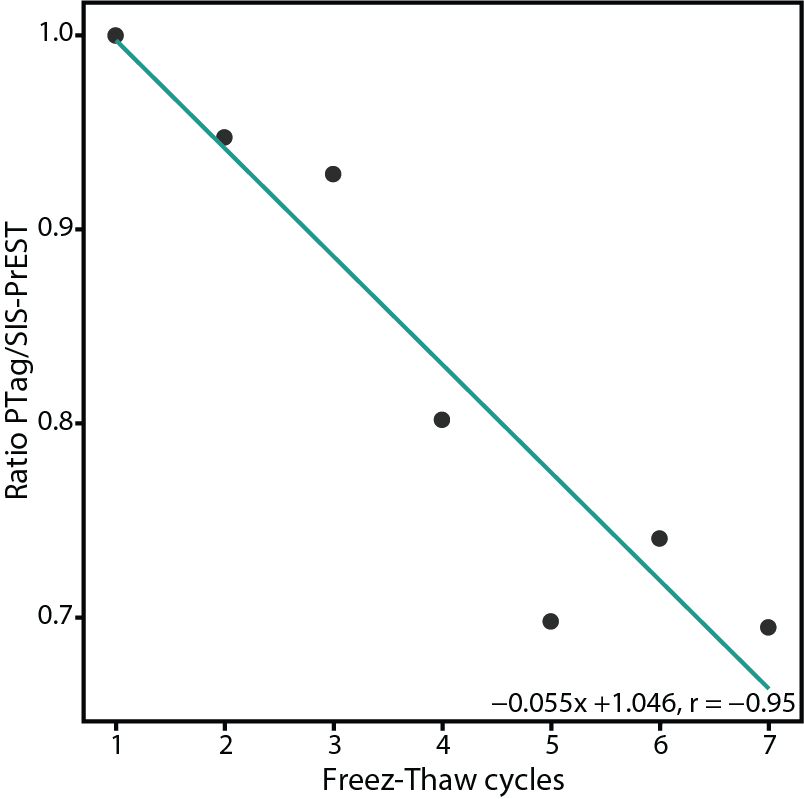


Supplementary Figure 1: **PTag decay over 7 freeze-thaw cycles.** Linear model used for normalization of PTag decay over multiple freeze-thaw cycles.
